# Supplementary material
Source: PubMed Central journal article supplement (PMC2727455)

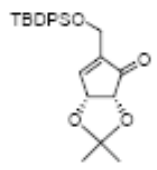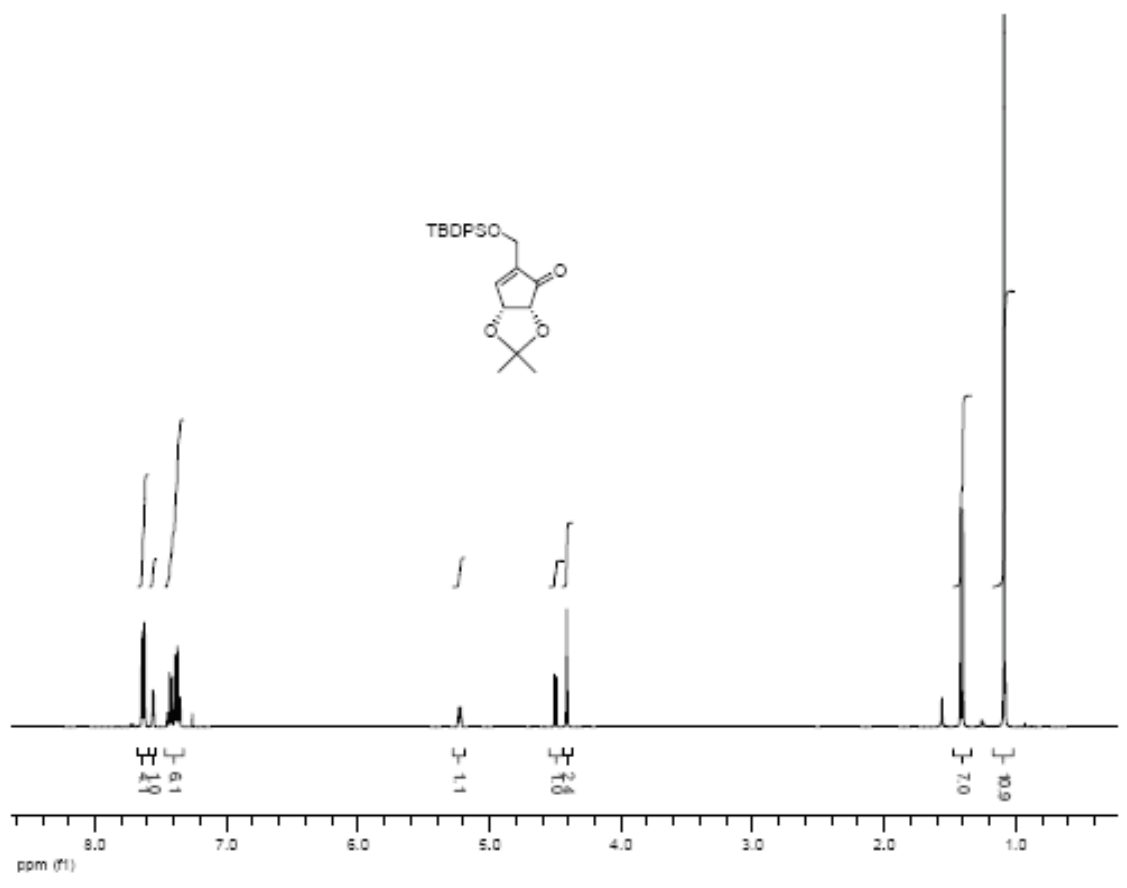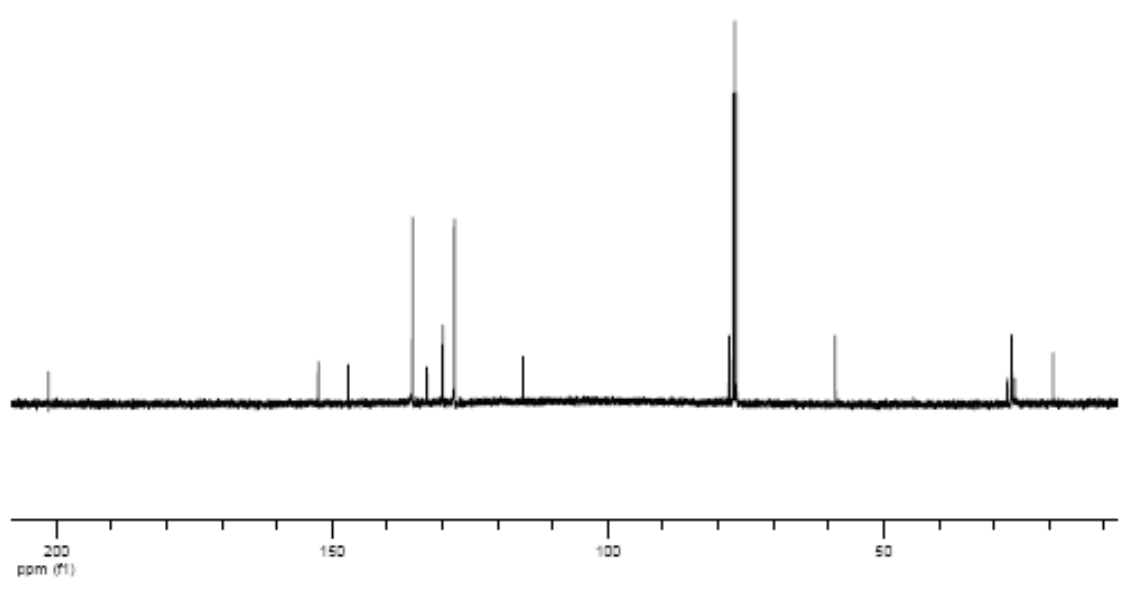

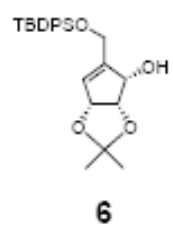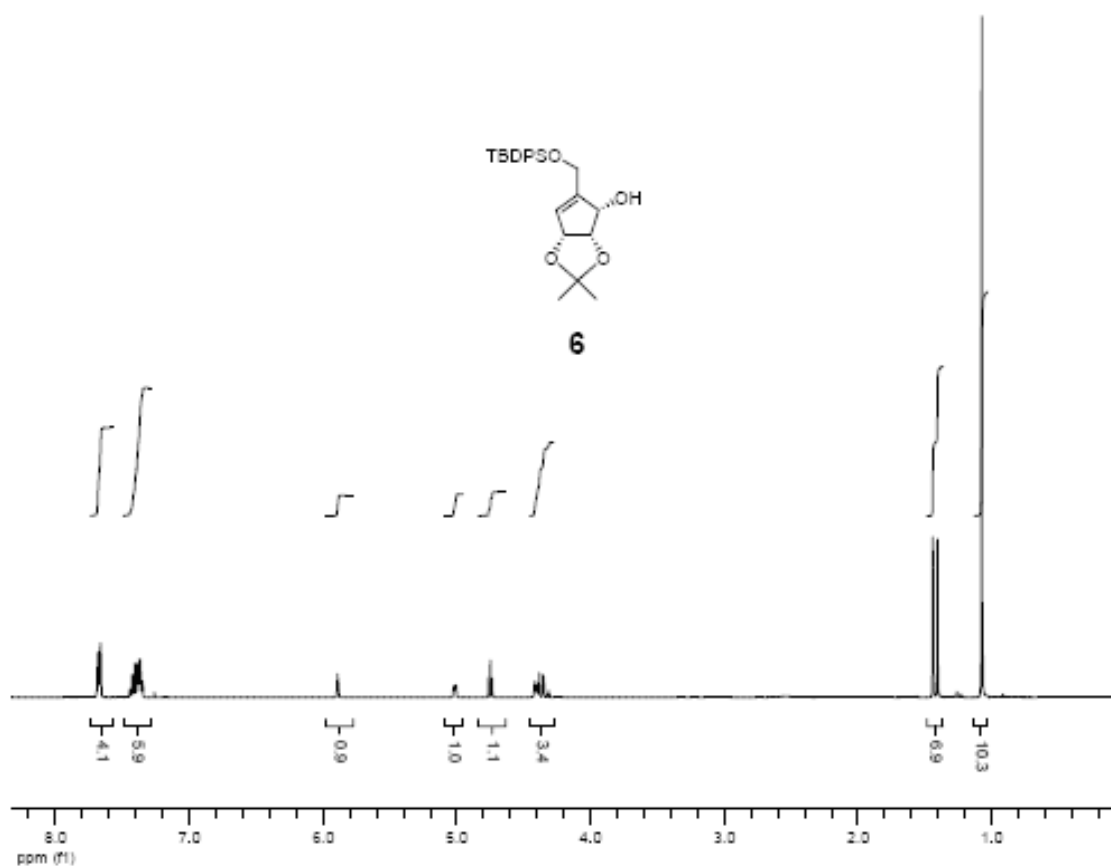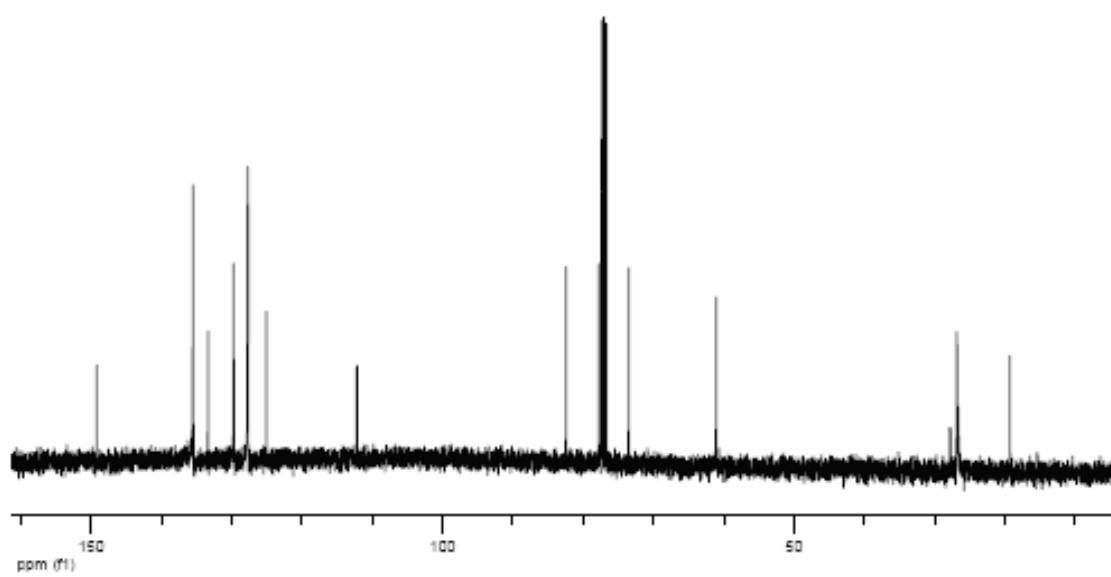

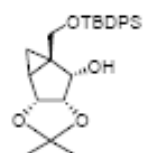

7

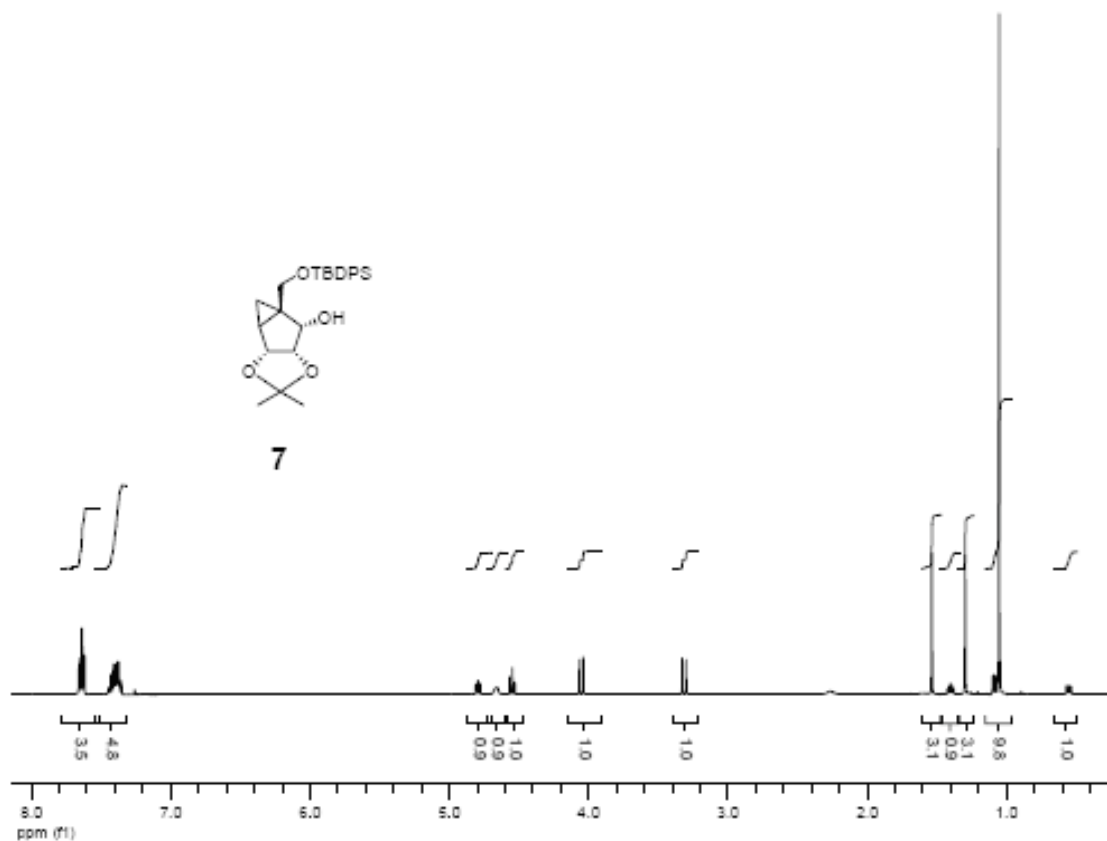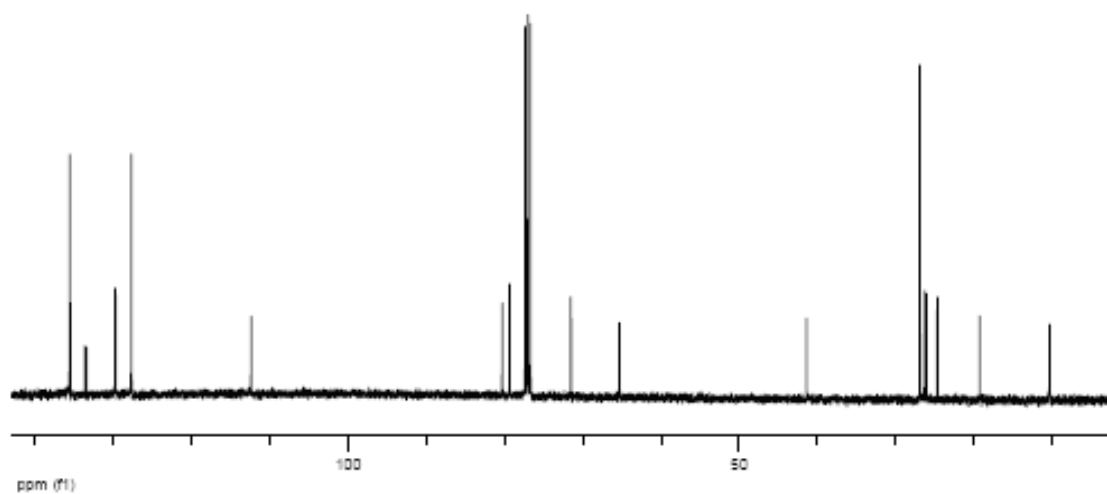

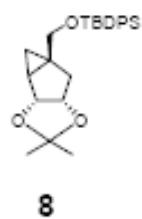

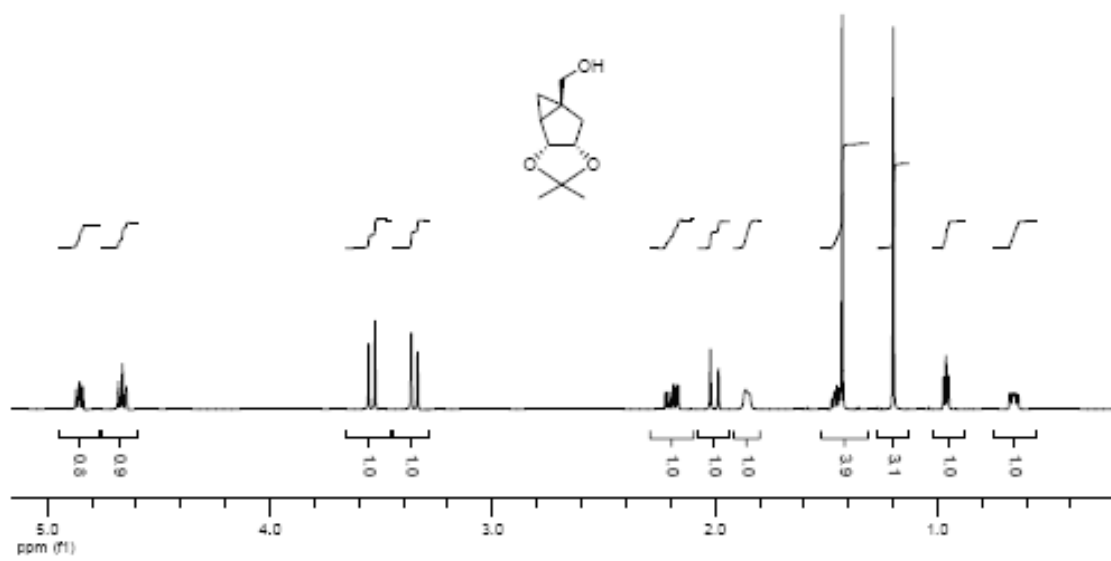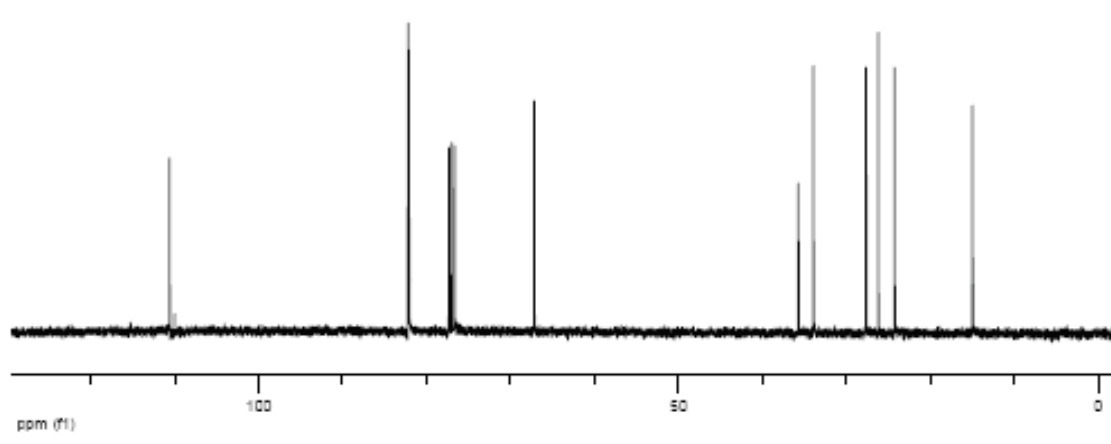

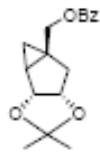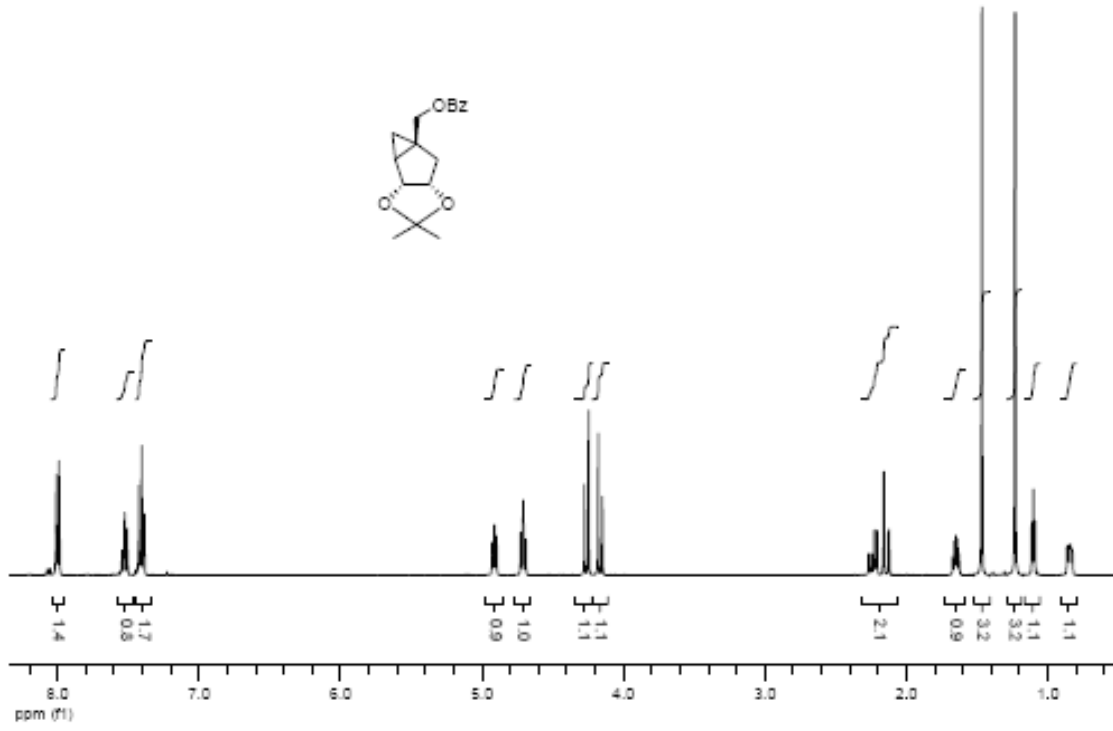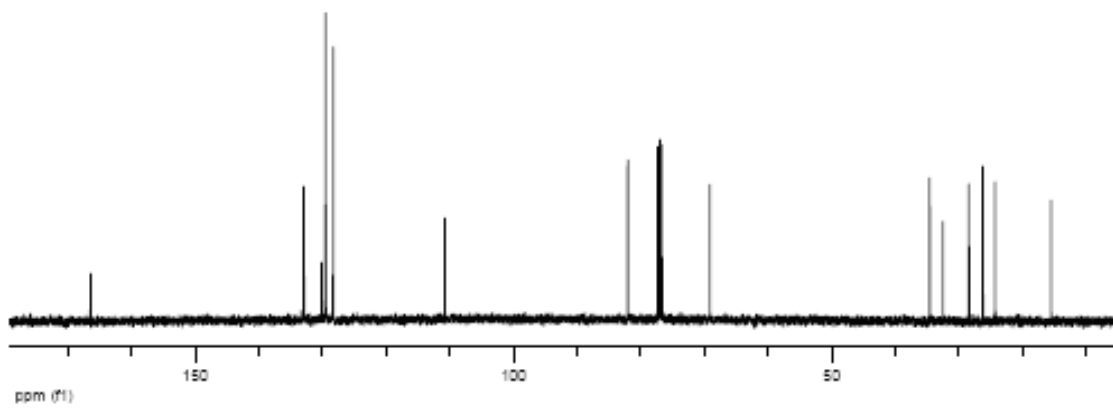

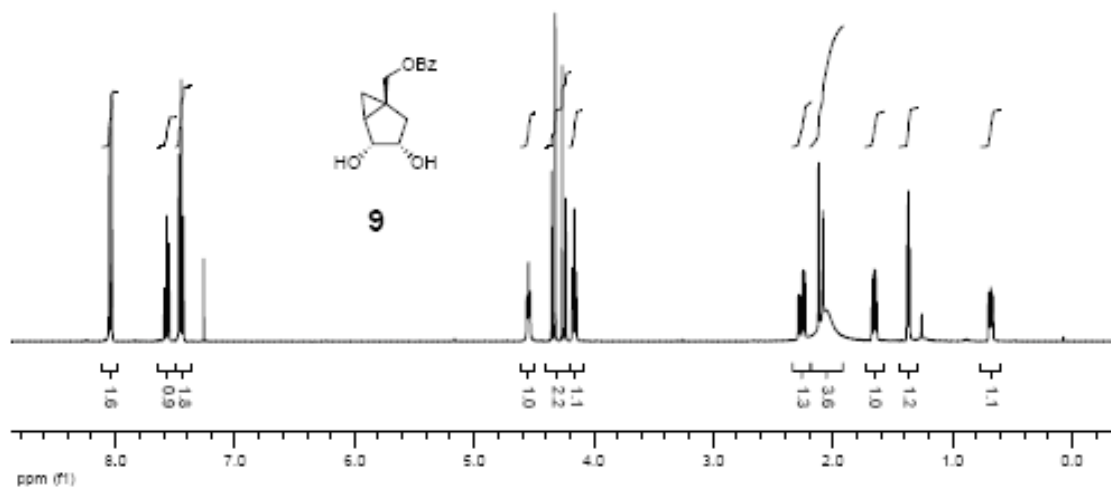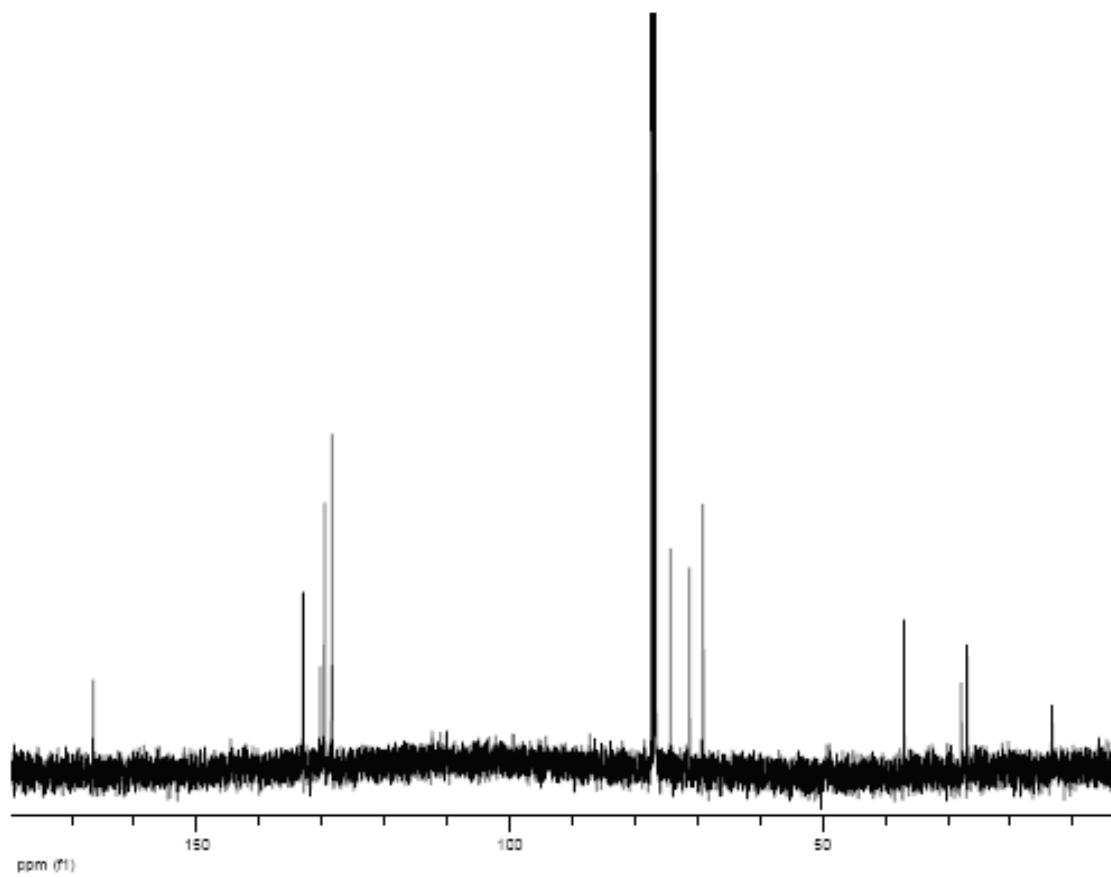

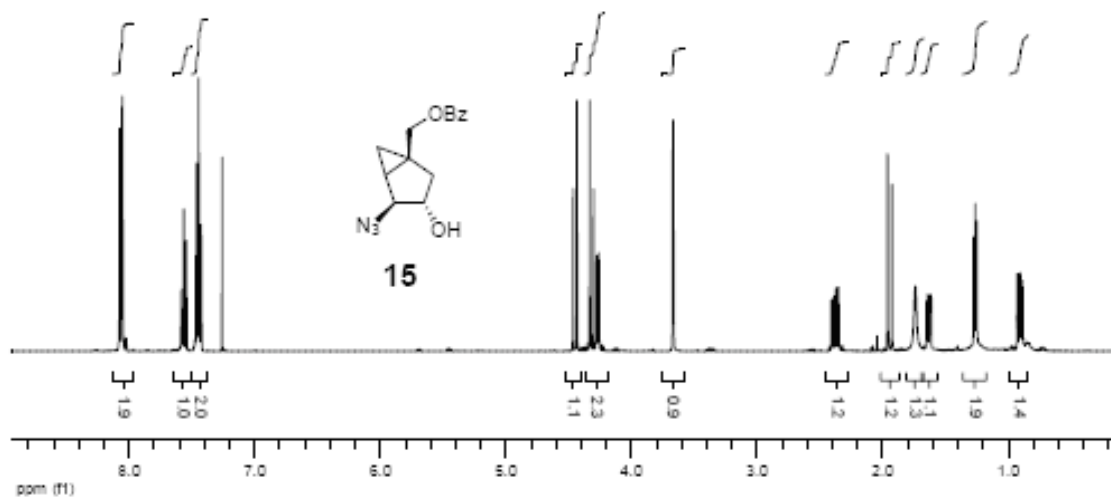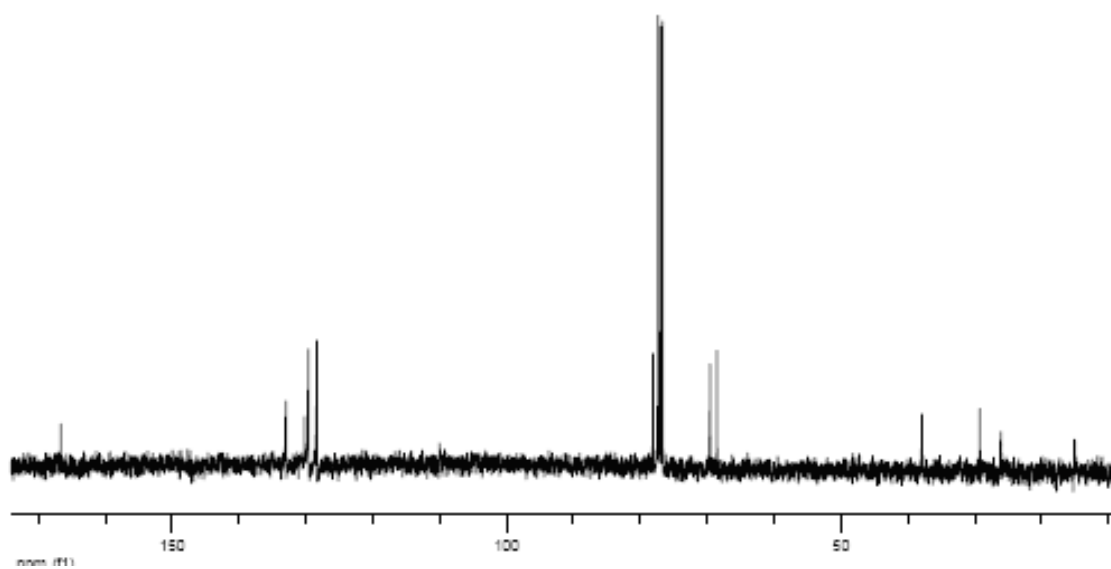



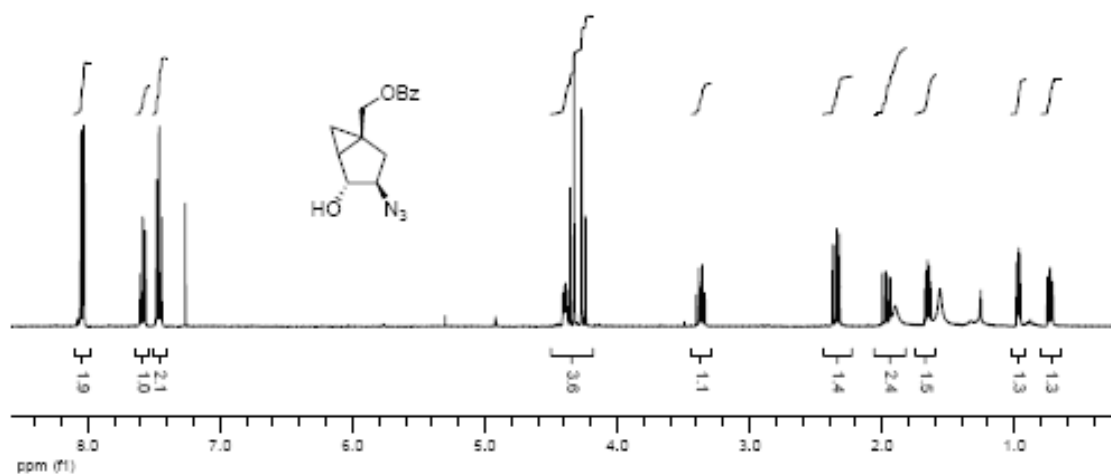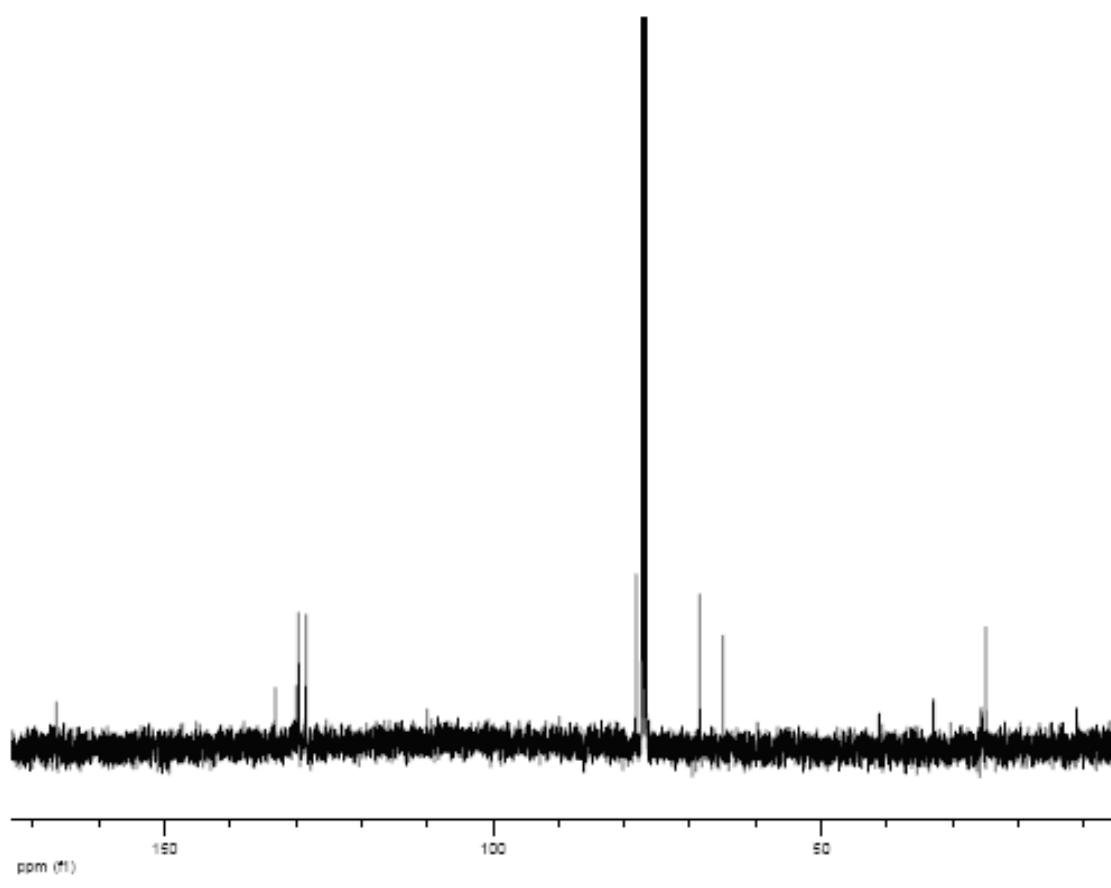

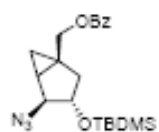

16

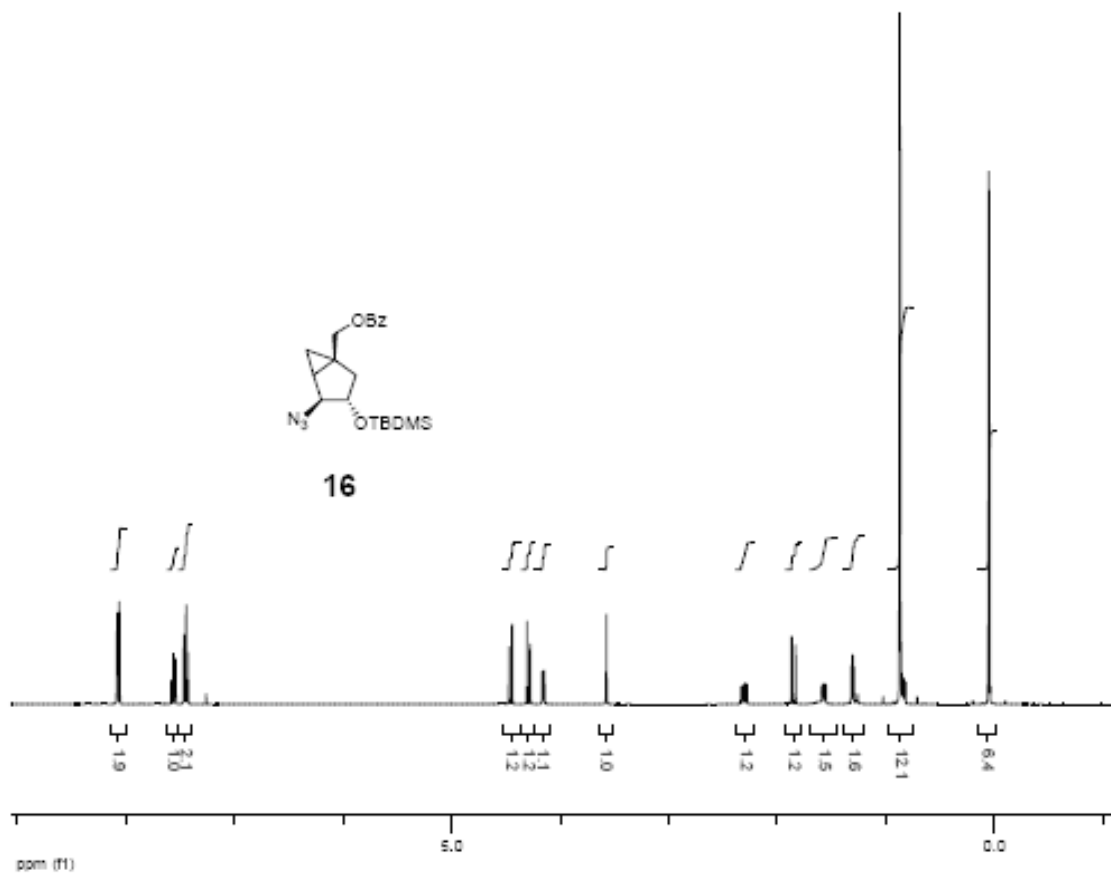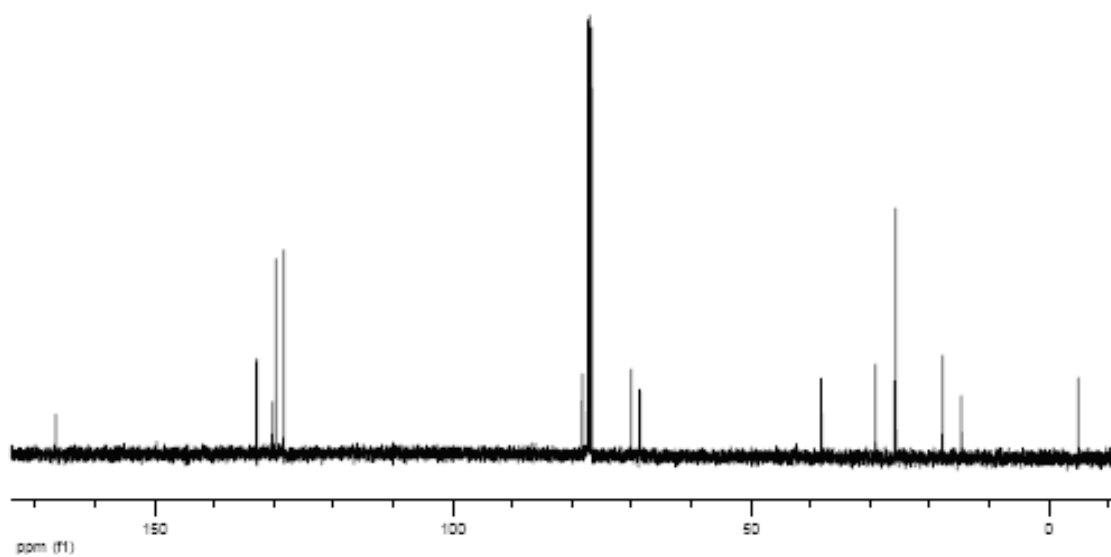

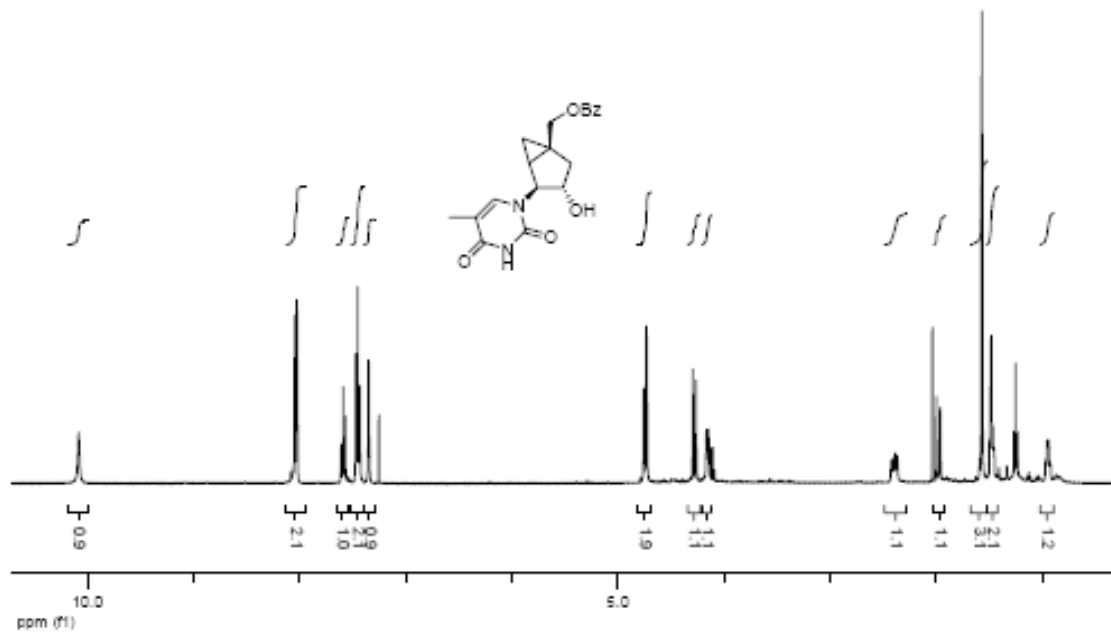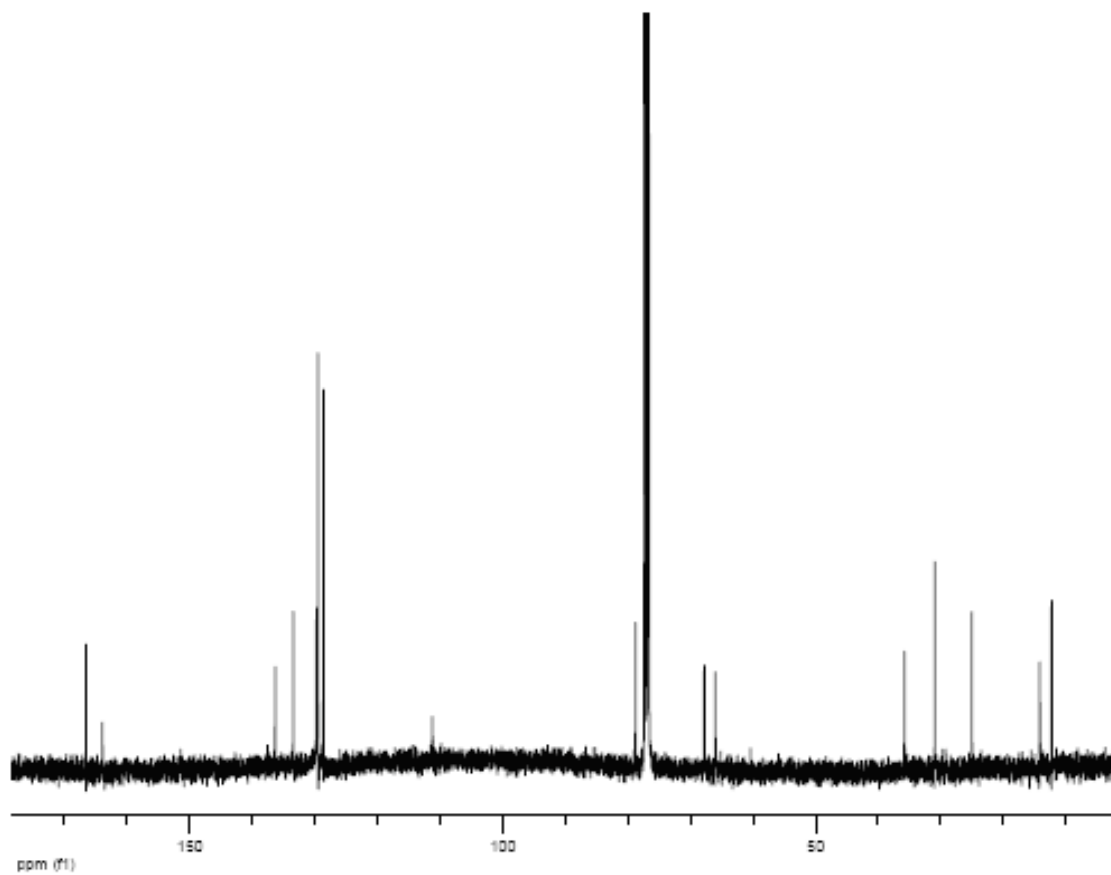

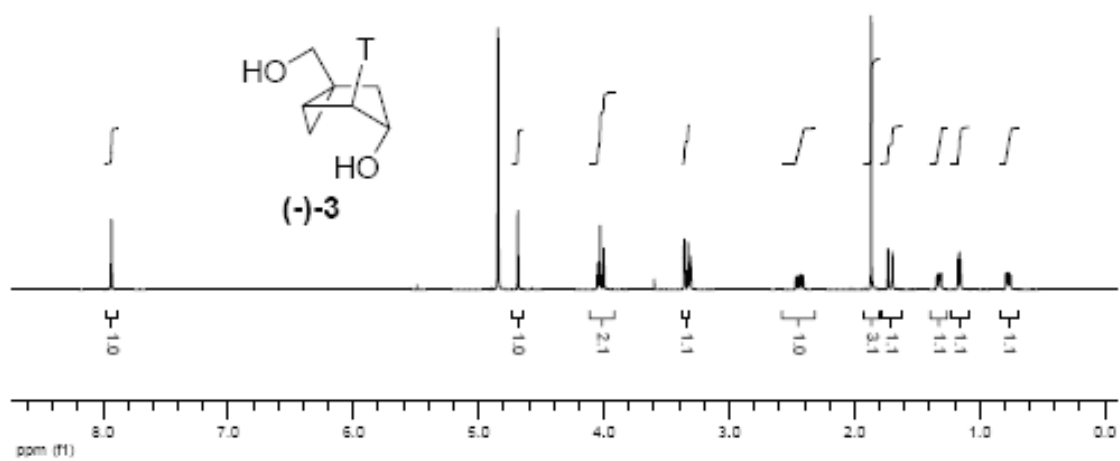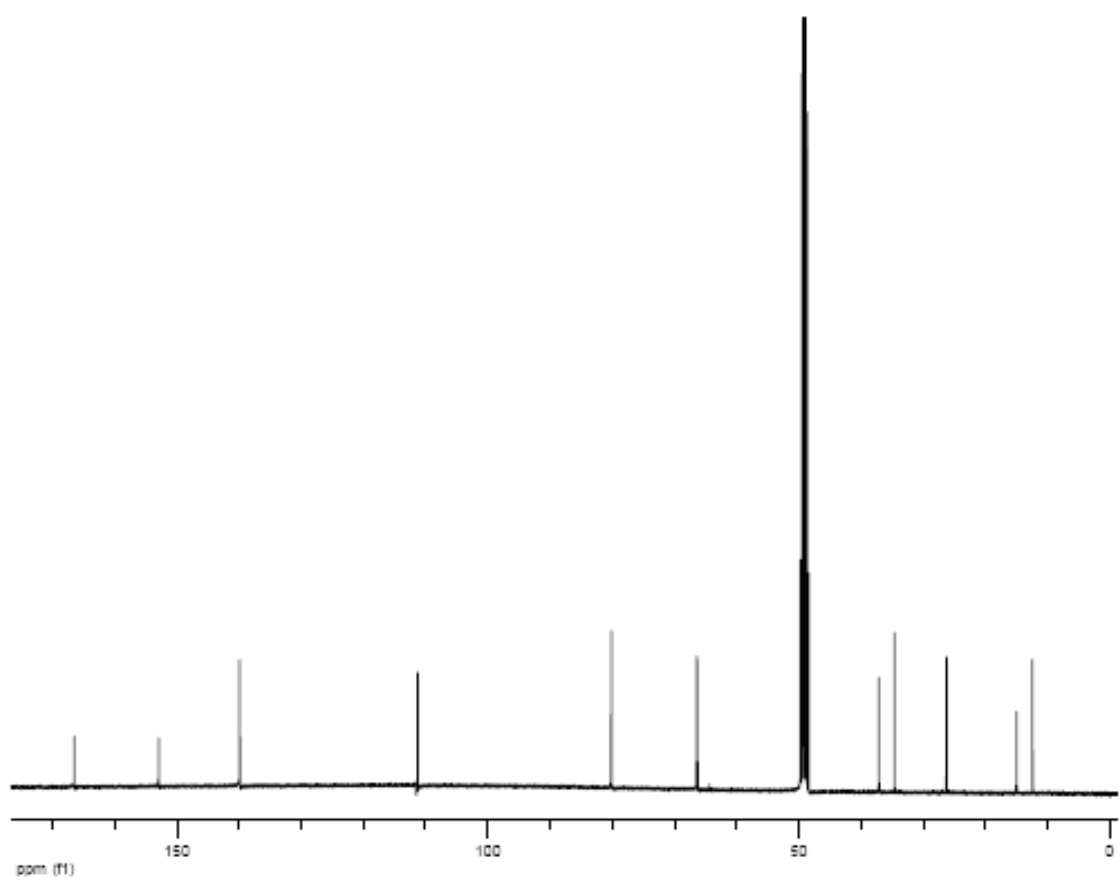

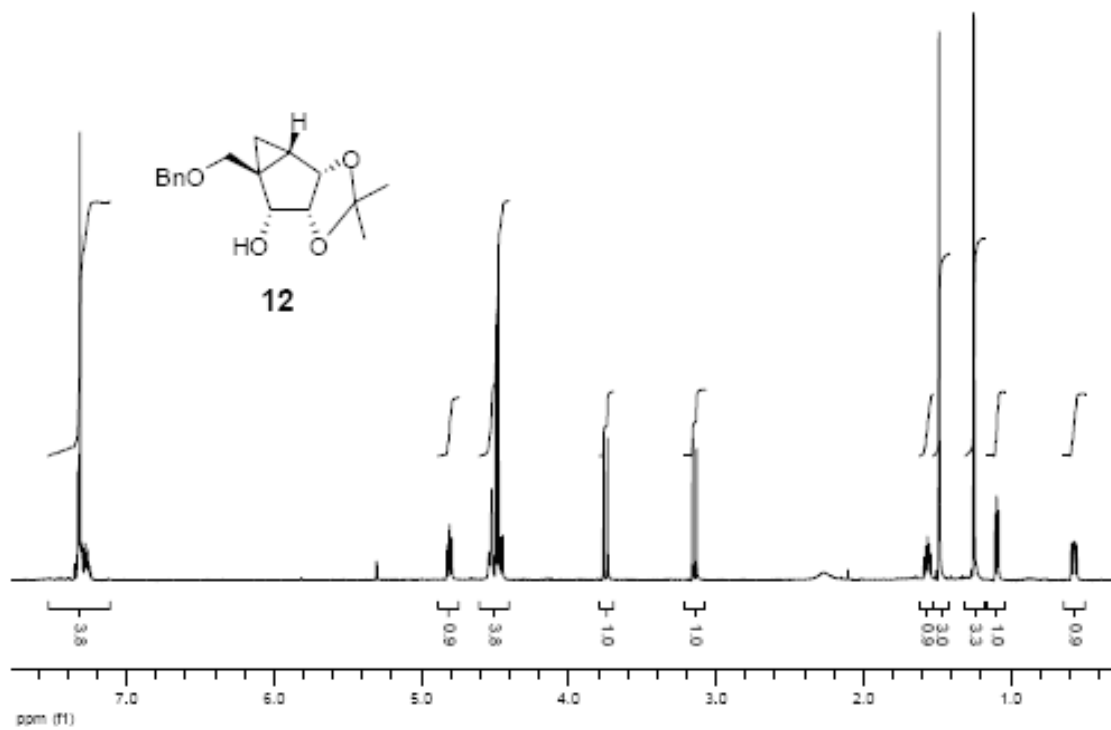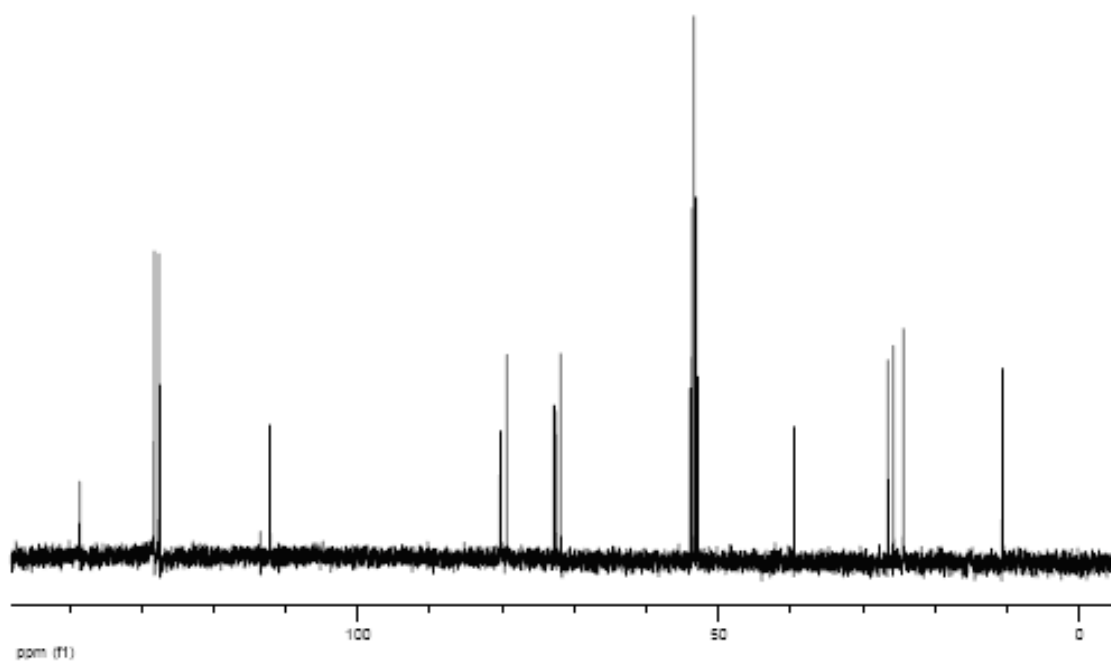

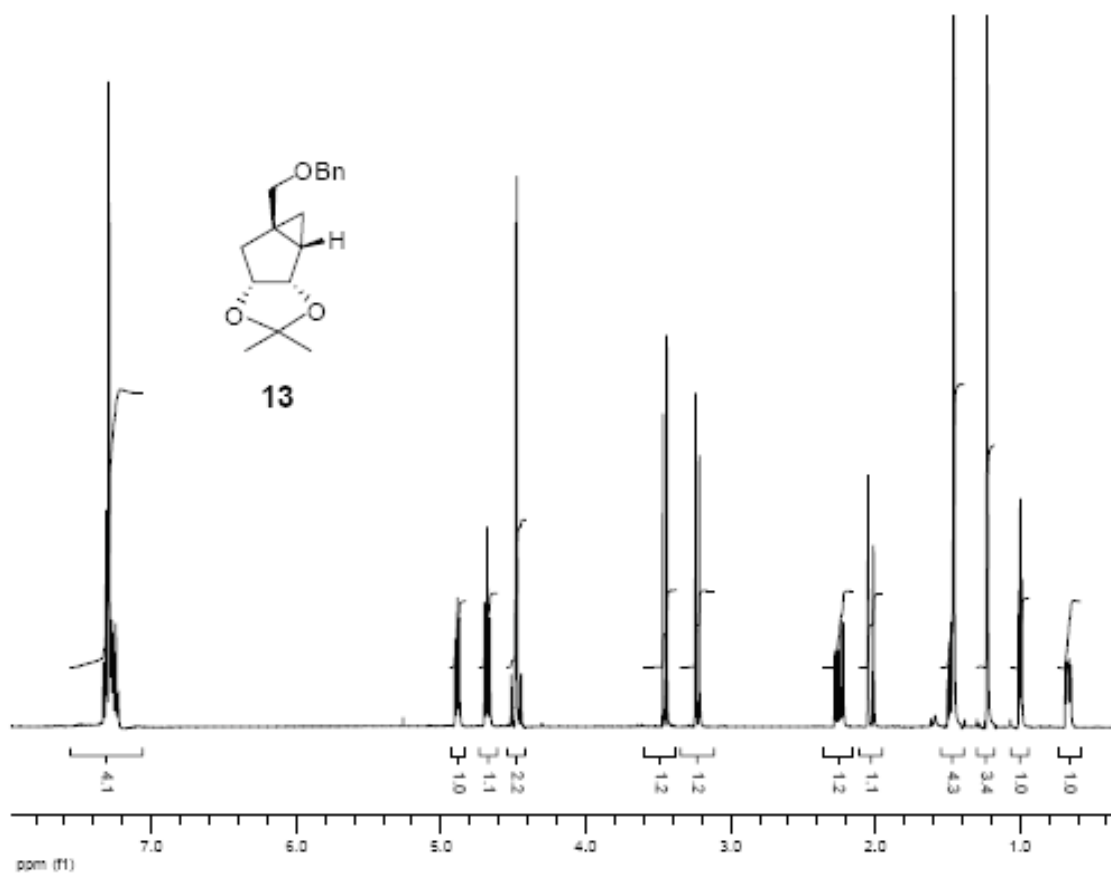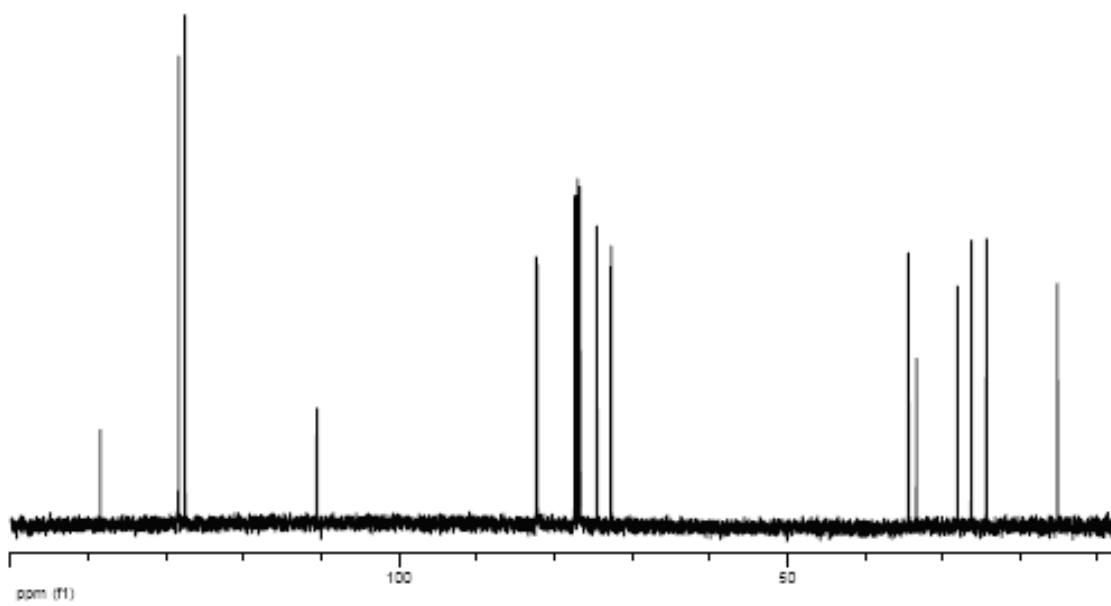

Supplement: NIHMS120282-supplement-CMC-iso-Carba-T.pdf [file NIHMS120282-supplement-CMC-iso-Carba-T.pdf]
